# Supplementary material for: Biophysical modeling of C. elegans neurons: Single ion currents and whole-cell dynamics of AWCon and RMD
Source: PubMed Central journal article supplement (PMC6602206; doi:10.1371/journal.pone.0218738), 2019-07-01
Supplement: pone.0218738.s002.pdf [file pone.0218738.s002.pdf]

S1 TABLE. MODEL PARAMETERS

| Voltage-gated K <sup>+</sup> currents |           |                |      |
|---------------------------------------|-----------|----------------|------|
| SHL1                                  |           |                |      |
| Parameter                             |           | Value          | Unit |
| $m_\infty$                            | $V_{0.5}$ | 11.2 (-6.8)    | mV   |
|                                       | $k_a$     | 14.1           | mV   |
| $h_\infty$                            | $V_{0.5}$ | -33.1          | mV   |
|                                       | $k_i$     | 8.3            | mV   |
| $\tau_m$                              | a         | 13.8 (1.4)     | ms   |
|                                       | b         | -17.5          | mV   |
|                                       | c         | 12.9           | mV   |
|                                       | d         | -3.7           | mV   |
|                                       | e         | 6.5            | mV   |
|                                       | f         | 1.9 (0.2)      | ms   |
| $\tau_h^f$                            | a         | 539.2 (53.9)   | ms   |
|                                       | b         | -28.2          | mV   |
|                                       | c         | 4.9            | mV   |
|                                       | d         | 27.3 (2.7)     | ms   |
| $\tau_h^s$                            | a         | 8422.0 (842.2) | ms   |
|                                       | b         | -37.7          | mV   |
|                                       | c         | 6.4            | mV   |
|                                       | d         | 118.9 (11.9)   | ms   |
| SHK1                                  |           |                |      |
| $m_\infty$                            | $V_{0.5}$ | 20.4           | mV   |
|                                       | $k_a$     | 7.7            | mV   |
| $h_\infty$                            | $V_{0.5}$ | -7.0           | mV   |
|                                       | $k_i$     | 5.8            | mV   |
| $\tau_m$                              | a         | 26.6           | ms   |
|                                       | b         | -33.7          | mV   |
|                                       | c         | 15.8           | mV   |
|                                       | d         | -33.7          | mV   |
|                                       | e         | 11.2           | mV   |
|                                       | f         | 3.8            | ms   |
| $\tau_h$                              | a         | 1400           | ms   |
| KVS1                                  |           |                |      |
| $m_\infty$                            | $V_{0.5}$ | 57.1 (27.1)    | mV   |
|                                       | $k_a$     | 25.0           | mV   |
| $h_\infty$                            | $V_{0.5}$ | 47.3 (17.3)    | mV   |
|                                       | $k_i$     | 11.1           | mV   |
| $\tau_m$                              | a         | 30.0 (3.0)     | ms   |
|                                       | b         | 18.1           | mV   |
|                                       | c         | -20            | mV   |
|                                       | d         | 1.0 (0.1)      | ms   |

|              |           |                |                  |
|--------------|-----------|----------------|------------------|
| $\tau_h^f$   | a         | 88.5 (8.9)     | ms               |
|              | b         | 50.0           | mV               |
|              | c         | -15.0          | mV               |
|              | d         | 53.4 (5.3)     | ms               |
| <b>KQT3</b>  |           |                |                  |
| $m_\infty$   | $V_{0.5}$ | -12.8 (7.7)    | mV               |
|              | $k_a$     | 15.8           | mV               |
| $w_\infty$   | $V_{0.5}$ | -1.1           | mV               |
|              | $k_i$     | 28.8           | mV               |
|              | a         | 0.5            |                  |
|              | b         | 0.5            |                  |
| $s_\infty$   | $V_{0.5}$ | -45.3          | mV               |
|              | $k_i$     | 12.3           | mV               |
|              | a         | 0.3            |                  |
|              | b         | 0.7            |                  |
| $\tau_m^f$   | a         | 395.3 (39.5)   | ms               |
|              | b         | -38.1          | mV               |
|              | c         | 33.6           | mV               |
| $\tau_m^s$   | a         | 5503.0 (550.3) | ms               |
|              | b         | 5345.4 (534.5) | ms               |
|              | c         | -0.0283        | mV <sup>-1</sup> |
|              | d         | -23.9          | mV               |
|              | e         | 4590 (459.1)   | ms               |
|              | f         | -0.0357        | mV <sup>-1</sup> |
|              | g         | 14.2           | mV               |
| $\tau_w$     | a         | 0.5            | ms               |
|              | b         | 2.9            | ms               |
|              | c         | -48.1          | mV               |
|              | d         | 48.8           | mV               |
| $\tau_s$     | a         | 500            | ms               |
| <b>EGL2</b>  |           |                |                  |
| $m_\infty$   | $V_{0.5}$ | 6.9            | mV               |
|              | $k_a$     | 14.9           | mV               |
| $\tau_m$     | a         | 16.8 (8.4)     | ms               |
|              | b         | -122.6         | mV               |
|              | c         | -13.8          | mV               |
|              | d         | 8.1 (4.1)      | ms               |
| <b>EGL36</b> |           |                |                  |
| $m_\infty$   | $V_{0.5}$ | 63.0           | mV               |
|              | $k_a$     | 28.5           | mV               |
| $\tau_m^s$   | a         | 355.0          | ms               |
| $\tau_m^m$   | a         | 63.0           | ms               |
| $\tau_m^f$   | a         | 13.0           | ms               |
| <b>IRK</b>   |           |                |                  |
| $m_\infty$   | $V_{0.5}$ | -86.5          | mV               |
|              | $k_a$     | -28.0          | mV               |
| $\tau_m$     | a         | 17.1           | ms               |

|                                               |             |               |    |
|-----------------------------------------------|-------------|---------------|----|
|                                               | b           | -17.8         | mV |
|                                               | c           | 20.3          | mV |
|                                               | d           | -43.4         | mV |
|                                               | e           | 11.2          | mV |
|                                               | f           | 3.8           | ms |
| <b>Voltage-gated Ca<sup>2+</sup> currents</b> |             |               |    |
| <b>EGL19</b>                                  |             |               |    |
| $m_\infty$                                    | $V_{0.5}$   | 5.6 (-4.4)    | mV |
|                                               | $k_a$       | 7.5           | mV |
| $h_\infty$                                    | $V_{0.5}$   | 24.9 (14.9)   | mV |
|                                               | $k_i$       | 12.0          | mV |
|                                               | $k_i^b$     | -10.5 (-20.5) | mV |
|                                               | $V_{0.5}^b$ | 8.1           | mV |
|                                               | a           | 1.4           |    |
|                                               | b           | 0.1           |    |
|                                               | c           | 6.0           |    |
|                                               | d           | 0.6           |    |
| $\tau_m$                                      | a           | 2.9           | ms |
|                                               | b           | 5.2 (-4.8)    | mV |
|                                               | c           | 6.0           | mV |
|                                               | d           | 1.9           | ms |
|                                               | e           | 1.4 (-8.6)    | mV |
|                                               | f           | 30.0          | mV |
|                                               | g           | 2.3           | ms |
| $\tau_h$                                      | a           | 0.4           |    |
|                                               | b           | 44.6          | ms |
|                                               | c           | -23.0 (-33.0) | mV |
|                                               | d           | 5.0           | mV |
|                                               | e           | 36.4          | ms |
|                                               | f           | 28.7(18.7)    | mV |
|                                               | g           | 3.7           | mV |
|                                               | h           | 43.1          | ms |
| <b>UNC2</b>                                   |             |               |    |
| $m_\infty$                                    | $V_{0.5}$   | -12.2 (-37.2) | mV |
|                                               | $k_a$       | 4.0           | mV |
| $h_\infty$                                    | $V_{0.5}$   | -52.5 (-77.5) | mV |
|                                               | $k_i$       | 5.6           | mV |
| $\tau_m$                                      | a           | 4.5           | ms |
|                                               | b           | -8.2 (-38.2)  | mV |
|                                               | c           | 9.1           | mV |
|                                               | d           | 15.4          | mV |
|                                               | e           | 0.3           | ms |
| $\tau_h$                                      | a           | 83.8 (142.5)  | ms |
|                                               | b           | 52.9 (22.9)   | mV |
|                                               | c           | 3.5           | mV |
|                                               | d           | 72.1 (122.6)  | ms |
|                                               | e           | 23.9 (-6.1)   | mV |
|                                               | f           | 3.6           | mV |

| <b>CCA1</b>                                             |           |                         |                                       |
|---------------------------------------------------------|-----------|-------------------------|---------------------------------------|
| $m_\infty$                                              | $V_{0.5}$ | -43.32(-57.7)           | mV                                    |
|                                                         | $k_a$     | 7.6 (2.4)               | mV                                    |
| $h_\infty$                                              | $V_{0.5}$ | -58.0 (-73.0)           | mV                                    |
|                                                         | $k_i$     | 7.0 (8.1)               | mV                                    |
| $\tau_m$                                                | a         | 40.0 (20)               | ms                                    |
|                                                         | b         | -62.5 (-92.5)           | mV                                    |
|                                                         | c         | -12.6 (21.1)            | mV                                    |
|                                                         | d         | 0.7 (0.4)               | ms                                    |
| $\tau_h$                                                | a         | 280 (22.4)              | ms                                    |
|                                                         | b         | -60.7 (-75.7)           | mV                                    |
|                                                         | c         | 8.5 (9.4)               | mV                                    |
|                                                         | d         | 19.8 (1.6)              | ms                                    |
| <b>Ca<sup>2+</sup>-regulated K<sup>+</sup> currents</b> |           |                         |                                       |
| <b>SLO1</b>                                             |           |                         |                                       |
| $w_{yx}$                                                |           | 0.013                   | mV <sup>-1</sup>                      |
| $w_{xy}$                                                |           | -0.028                  | mV <sup>-1</sup>                      |
| $w_0^-$                                                 |           | 3.15                    | ms <sup>-1</sup>                      |
| $w_0^+$                                                 |           | 0.16                    | ms <sup>-1</sup>                      |
| $K_{xy}$                                                |           | 55.73                   | $\mu$ M                               |
| $n_{xy}$                                                |           | 1.30                    |                                       |
| $K_{yx}$                                                |           | 0.034                   | $\mu$ M                               |
| $n_{yx}$                                                |           | 10 <sup>-4</sup>        |                                       |
| <b>SLO2</b>                                             |           |                         |                                       |
| $w_{yx}$                                                |           | 0.019                   | mV <sup>-1</sup>                      |
| $w_{xy}$                                                |           | -0.024                  | mV <sup>-1</sup>                      |
| $w_0^-$                                                 |           | 0.87                    | ms <sup>-1</sup>                      |
| $w_0^+$                                                 |           | 0.028                   | ms <sup>-1</sup>                      |
| $K_{xy}$                                                |           | 93.45                   | $\mu$ M                               |
| $n_{xy}$                                                |           | 1.84                    |                                       |
| $K_{yx}$                                                |           | 3294.55                 | $\mu$ M                               |
| $n_{yx}$                                                |           | 10 <sup>-5</sup>        |                                       |
| <b>KCNL</b>                                             |           |                         |                                       |
| $K_{Ca}$                                                |           | 0.33                    | $\mu$ M                               |
| $\tau_m$                                                | a         | 6.3                     | ms                                    |
| <b>Intracellular calcium calculation</b>                |           |                         |                                       |
| $g_{sc}$                                                |           | 40                      | pS                                    |
| $V_{Ca}$                                                |           | 60                      | mV                                    |
| $r$                                                     |           | 13                      | nm                                    |
| $F$                                                     |           | 96485                   | C mol <sup>-1</sup>                   |
| $D_{Ca}$                                                |           | 250                     | $\mu^2$ m s <sup>-1</sup>             |
| $k_B^+$                                                 |           | 500                     | $\mu$ M <sup>-1</sup> s <sup>-1</sup> |
| $[B]_{tot}$                                             |           | 30                      | $\mu$ M                               |
| $[Ca^{2+}]_{c,i}^n$                                     |           | 0.05                    | $\mu$ M                               |
| $V_{cell}$                                              |           | 31.16 (AWC), 5.65 (RMD) | $\mu$ m <sup>3</sup>                  |
| $f$                                                     |           | 0.001                   |                                       |
| $\tau_{Ca}$                                             |           | 50                      | ms                                    |

|                                  |      |               |
|----------------------------------|------|---------------|
| $[\text{Ca}^{2+}]_{\text{eq}}^m$ | 0.05 | $\mu\text{M}$ |
|----------------------------------|------|---------------|
